# Supplementary material
Source: HighWire-hosted journal article supplement (https://qualitysafety.bmj.com/content/28/10/846)
Supplement: inline-supplementary-material-2 [file inline-supplementary-material-2.pdf]

Appendix 2. Logistic regression modeling of all TSH assay requests sent to the lab and specifically charted orders

| <b>Outcome:</b> TSH assay request sent to lab |                       |            |              |         |
|-----------------------------------------------|-----------------------|------------|--------------|---------|
| Crude                                         |                       |            |              |         |
| Variable                                      |                       | Odds ratio | 95% CI       | p-value |
| Group                                         | ref: pre-intervention | 0.10       | 0.06, 0.17   | <0.0001 |
| Adjusted                                      |                       |            |              |         |
| Group                                         | ref: pre-intervention | 0.10       | 0.06, 0.19   | <0.0001 |
| Age, years                                    |                       | 1.012      | 0.99, 1.03   | 0.25    |
| Sex                                           | ref: male             | 2.26       | 1.17, 4.35   | 0.01    |
| New atrial fibrillation                       | ref: no               | 0.45       | 0.08, 2.45   | 0.36    |
| Potentially thyroid-related symptoms          | ref: none             | 0.67       | 0.27, 1.70   | 0.40    |
| Adjusted, significant predictors only         |                       |            |              |         |
| Group                                         | ref: pre-intervention | 0.10       | 0.05, 0.17   | <0.0001 |
| Sex                                           | ref: male             | 2.55       | 1.35, 4.82   | 0.004   |
| <b>Outcome:</b> Charted TSH assay order       |                       |            |              |         |
| Variable                                      |                       |            |              |         |
| Crude                                         |                       |            |              |         |
| Group                                         | ref: pre-intervention | 0.04       | 0.02, 0.09   | <0.0001 |
| Adjusted                                      |                       |            |              |         |
| Group                                         | ref: pre-intervention | 0.04       | 0.02, 0.09   | <0.0001 |
| Age                                           |                       | 1.003      | 0.981, 1.024 | 0.82    |
| Sex                                           | ref: female           | 1.24       | 0.65, 2.36   | 0.52    |
| New atrial fibrillation                       | ref: no               | 1.27       | 0.38, 4.25   | 0.69    |
| Potentially thyroid-related symptoms          | ref: no               | 1.032      | 0.45, 2.36   | 0.94    |
| Adjusted, significant predictors only         |                       |            |              |         |
| None                                          |                       |            |              |         |

TSH = thyroid stimulating hormone; CI = confidence interval; ref = reference
